# Supplementary material for: Histone Deacetylation Controls Xylem Vessel Cell Differentiation via Transcriptional Regulation of a Transcription Repressor Complex OFP1/4–MYB75–KNAT7–BLH6
Source: Frontiers journal article supplement (doi:10.3389/fpls.2021.825810), 2022-01-27
Supplement: Data_Sheet_1.PDF [file Data_Sheet_1.PDF]

## Supplementary Material

### 1 Supplementary Figure and Table

#### 1.1 Supplementary Figure

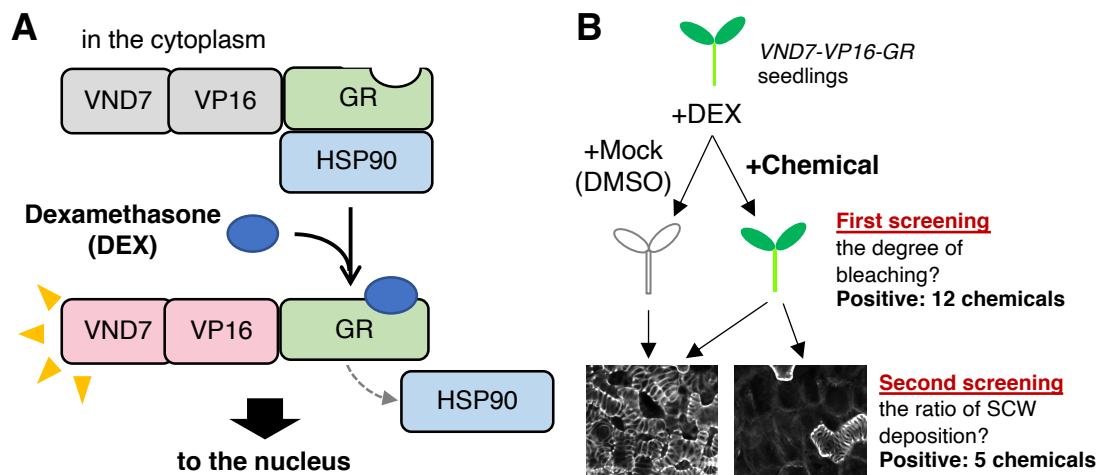

**Supplementary Figure 1. Screening strategy for cellular stress inducers affecting xylem vessel cell differentiation.** (A) Schematic showing the mode of action of the *VND7-VP16-GR* system. The chimeric *VND7-VP16-GR* protein is localized in the cytoplasm in the absence of a glucocorticoid, since the glucocorticoid receptor (GR) interacts with heat shock protein 90 (HSP90) to prevent its entry into the nucleus. In the presence of glucocorticoid molecules, such as the synthetic glucocorticoid dexamethasone (DEX), GR changes its structure to release HSP90, allowing the *VND7-VP16-GR* protein to localize to the nucleus. This activates the transcriptional activity of *VND7*. (B) Screening of known cellular stress inducers to isolate inhibitors of xylem vessel cell differentiation. Treatment with only 10 nM DEX bleaches the *VND7-VP16-GR* seedlings because of the progression of programmed cell death. In the first screening, we checked the inhibitory activity of bleaching and obtained 12 inhibitors as positive chemicals. Subsequently, these 12 chemicals were tested for inhibitory activity of SCW deposition by confocal microscopy (second screening).

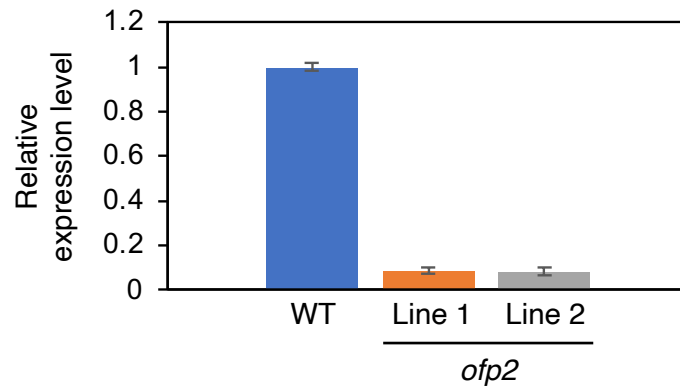

**Supplementary Figure S2. The *OFP2* gene expression in two individual mutants of *ofp2*.** The *OFP2* mRNA level was quantified by reverse transcription quantitative PCR. Results are shown relative to the wild type as 1.0 (means  $\pm$  SD,  $n = 3$ ).

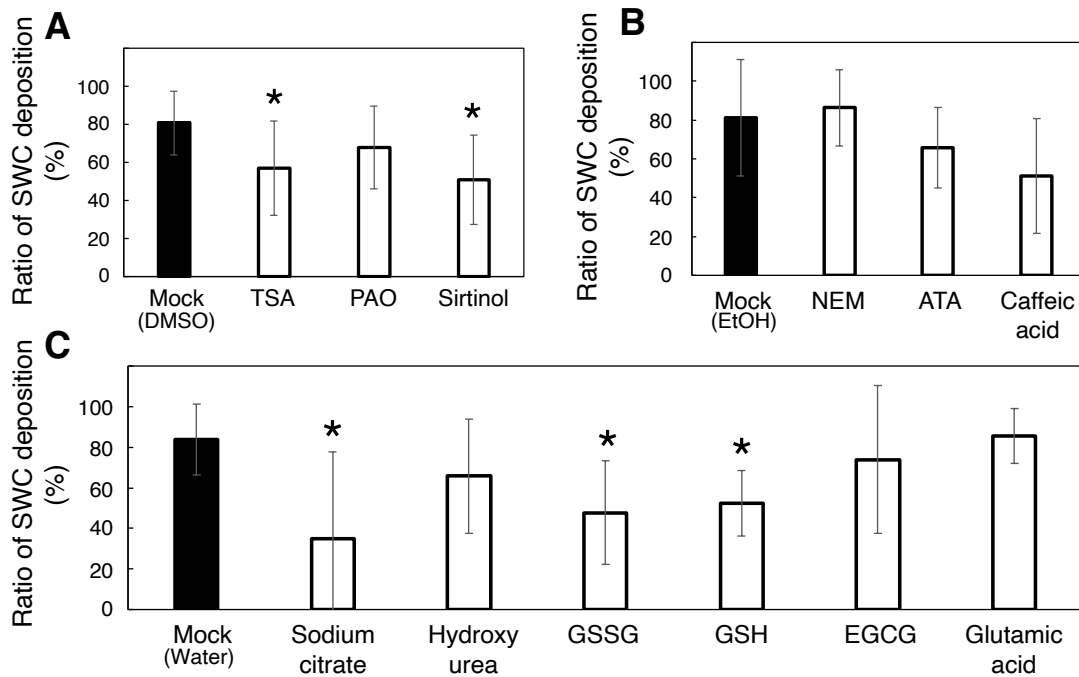

**Supplementary Figure S3. Effects of selected cellular stress inducers on secondary cell wall (SCW) deposition in *VND7-VPI6-GR* seedlings.** Seven-day-old *VND7-VPI6-GR* seedlings were treated with 10 nM dexamethasone (DEX) and either 5  $\mu$ M trichostatin A (TSA), 1  $\mu$ M phenylarsine oxide (PAO), 10  $\mu$ M sirtinol (**A**), 20  $\mu$ M N-ethylmaleimide (NEM), 50  $\mu$ M aurintricarboxylic acid (ATA), 1 mM caffeic acid (**B**), 50 mM sodium citrate, 1 mM hydroxy urea, 3 mM oxidized glutathione (GSSG, glutathione-S-S-glutathione), 3 mM reduced glutathione (GSH, glutathione-SH), 1  $\mu$ M epigallocatechin gallate (EGCG), or 1 mM glutamic acid (**C**). Ectopic SCWs in cotyledons were observed with a confocal microscope after propidium iodide staining, and the SCW-positive regions were measured in each cotyledon. The relative proportions of SCW-positive cell regions were calculated manually using an image analysis performed in ImageJ. Results are shown as means  $\pm$  SD ( $n > 10$ ). Asterisks indicate statistically significant differences compared with the mock control (Student's *t*-test,  $p < 0.05$ ).

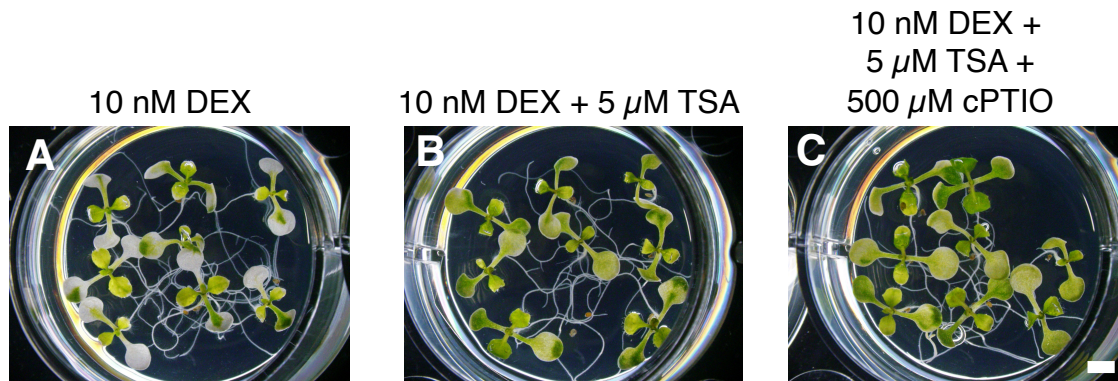

**Supplementary Figure S4. Effects of nitric oxide (NO) scavenger on trichostatin A (TSA)-induced inhibition of xylem vessel cell differentiation.** Seven-day-old *VND7-VP16-GR* seedlings were treated with 10 nM dexamethasone (DEX) and 5  $\mu$ M TSA, with or without 500  $\mu$ M 2-(4-Carboxyphenyl)-4,4,5,5-tetramethylimidazoline-1-oxyl-3-oxide (cPTIO), as an NO scavenger, for 3 d. The application of cPTIO did not affect the degree of bleaching in the *VND7-VP16-GR* seedlings. Bar, 1 mm.

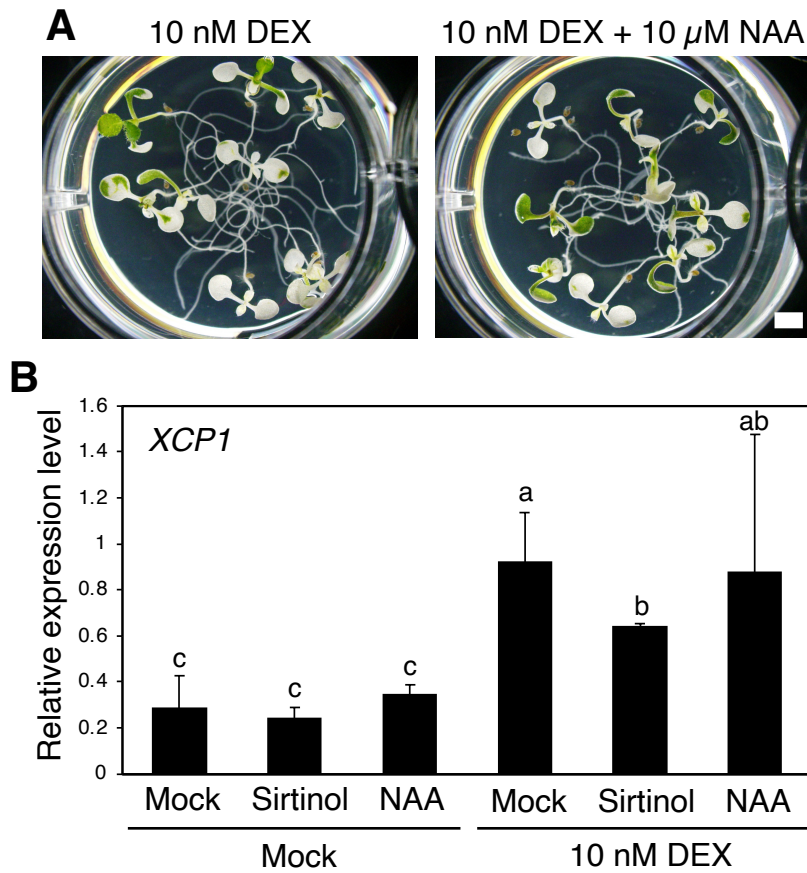

**Supplementary Figure S5. Effects of auxin on xylem vessel cell differentiation in *VND7-VP16-GR*.** Seven-day-old *VND7-VP16-GR* seedlings were treated with 10 nM dexamethasone (DEX) with or without 10  $\mu$ M 1-naphthaleneacetic acid (NAA) for 3 d. The application of NAA did not affect the degree of bleaching in the *VND7-VP16-GR* seedlings (**A**) and the induction of *XCP1* gene, a typical direct target gene of VND7, after 24 h of DEX treatment (**B**). Bar, 1 mm.

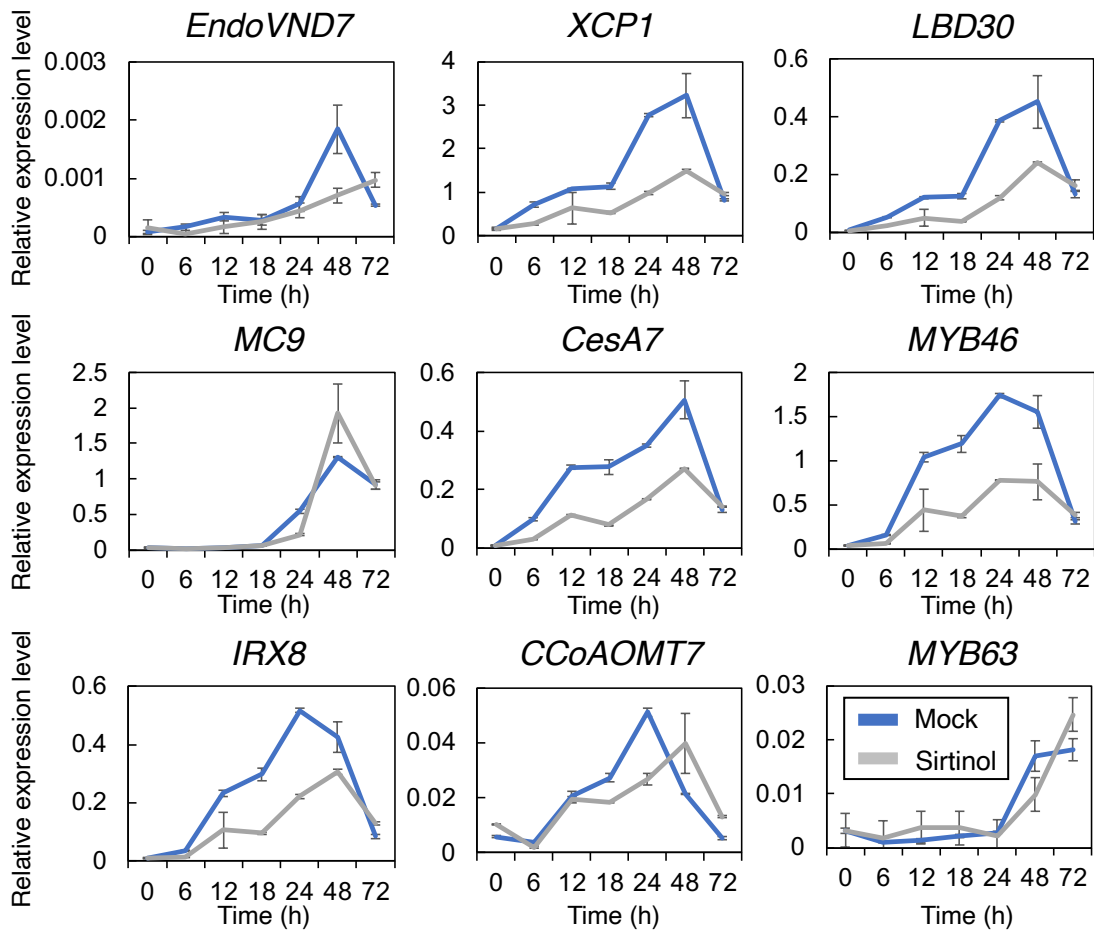

**Supplementary Figure S6. Reverse transcription quantitative PCR analysis of the genes downstream of VND7 in *VND7-VPI6-GR* treated with dexamethasone (DEX) and sirtinol.** Seven-day-old *VND7-VPI6-GR* seedlings were treated with 10 nM DEX and 10  $\mu$ M sirtinol, and sampled after 0, 6, 12, 18, 24, 48, and 72 h. The expression levels of the genes downstream of VND7 were normalized to the expression level of the internal control *UBIQUITIN10*. Results are shown as means  $\pm$  SD ( $n = 3$ ).

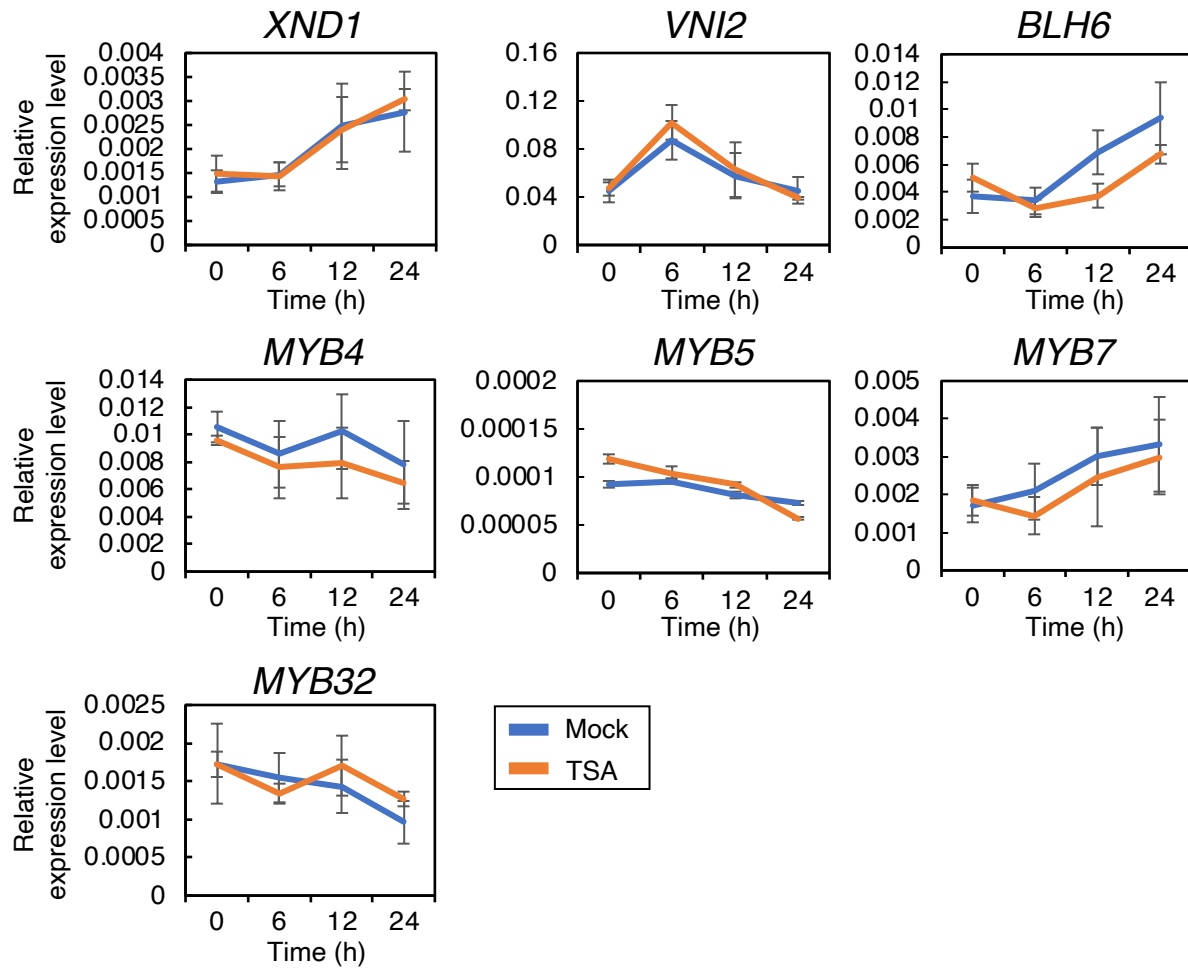

**Supplementary Figure S7. Reverse transcription quantitative PCR analysis of genes for transcription factors known to negatively regulate xylem vessel cell differentiation.** Seven-day-old *VND7–VP16–GR* seedlings were treated with 10 nM DEX and 5  $\mu$ M trichostatin A (TSA), and sampled after 0, 6, 12, 18, and 24 h. The expression levels of the genes downstream of *VND7* were normalized to the expression level of the internal control *UBIQUITIN10*. Results are shown as means  $\pm$  SD ( $n = 3$ ).

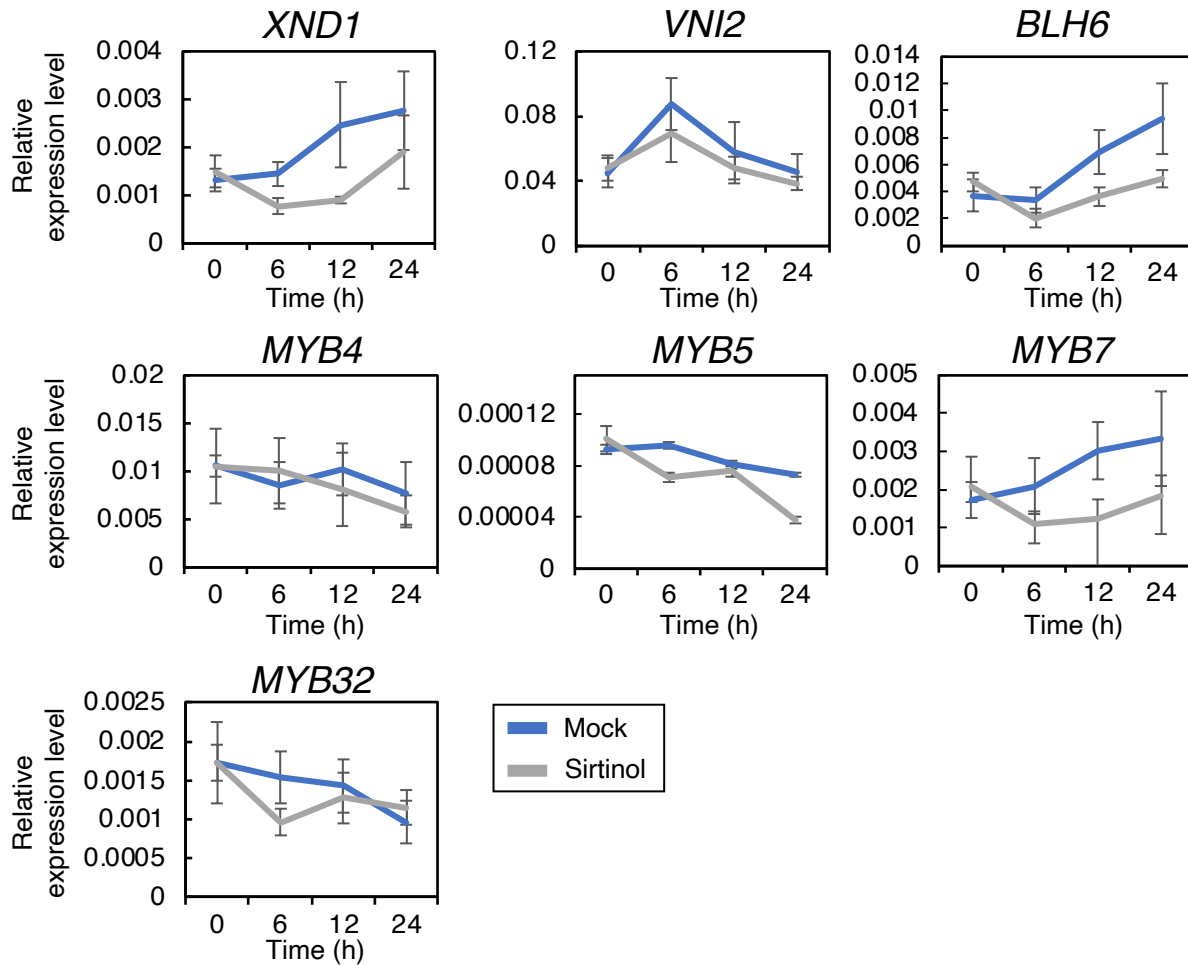

**Supplementary Figure S8. Reverse transcription quantitative PCR analysis of the genes for known transcription factors negatively regulating xylem vessel cell differentiation.** Seven-day-old *VND7–VP16–GR* seedlings were treated with 10 nM dexamethasone (DEX) and 10  $\mu$ M sirtinol, and sampled after 0, 6, 12, 18, and 24 h. The expression levels of the genes downstream of VND7 were normalized to the expression level of the internal control *UBIQUITIN10*. Results are shown as means  $\pm$  SD ( $n = 3$ ).



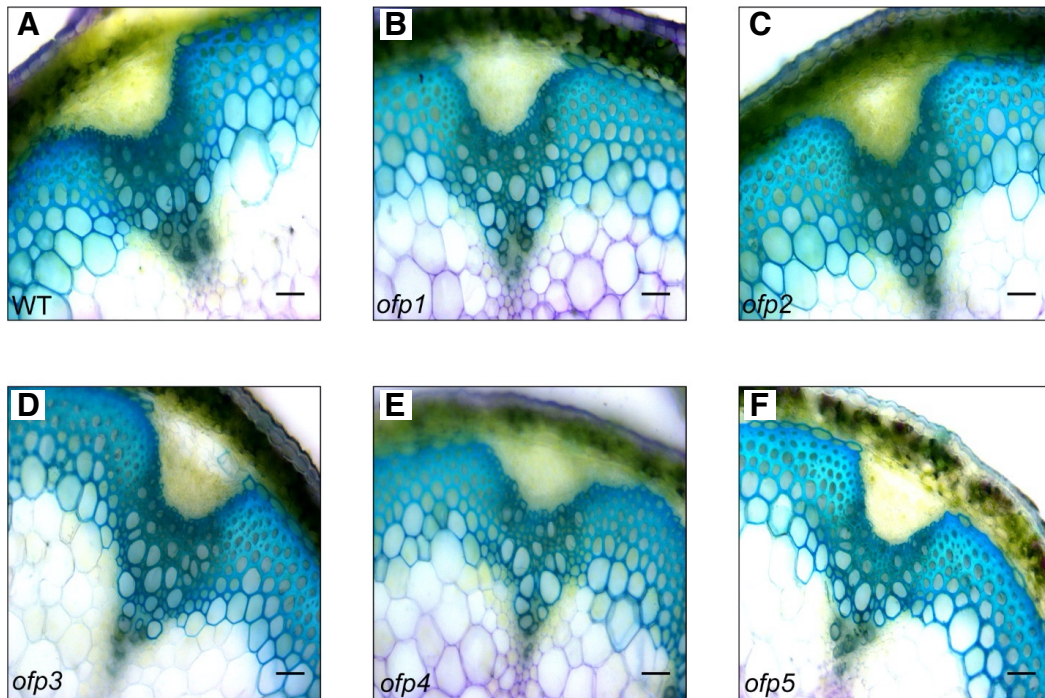

**Supplementary Figure S9. Cross-sections of stem vascular bundles in wild type (WT) and *ofp* single mutants.** Stem sections from the base of 8-week-old *Arabidopsis* plants of the wild type (WT) (A), *ofp1* (B), *ofp2* (C), *ofp3* (D), *ofp4* (E), and *ofp5* (F) stained with toluidine blue. A single representative vascular bundle is shown from each mutant. No obvious differences are shown in xylem or interfascicular fiber morphology between *ofp* single mutants and the wild type. Bars = 20  $\mu$ m.

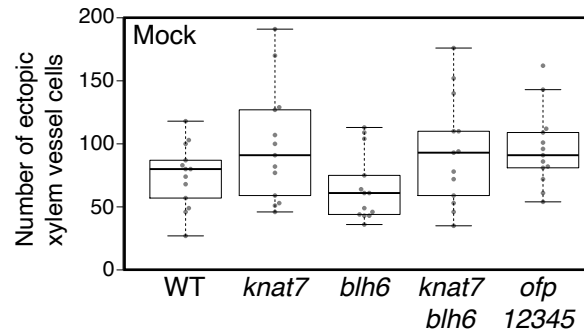

**Supplementary Figure S10. Box plot of the number of ectopic xylem vessel cells per cotyledon in the KDB system (related to Figure 6).** Excised cotyledons from seven-day-old wild-type, *knat7-1*, *blh6-1*, *knat7 blh6*, and *ofp1 ofp2 ofp3 ofp4 ofp5 (ofp12345)* seedlings were treated with phytohormones to induce ectopic xylem vessel cell differentiation. The number of ectopic xylem vessel cells under the mock treatment is shown ( $n = 13$ ). In box plots, center lines show the medians; box limits indicate the 25th and 75th percentiles; whiskers extend 1.5 times the interquartile range from the 25th and 75th percentiles, outliers are represented by dots. No statistically significant differences were found among the lines.

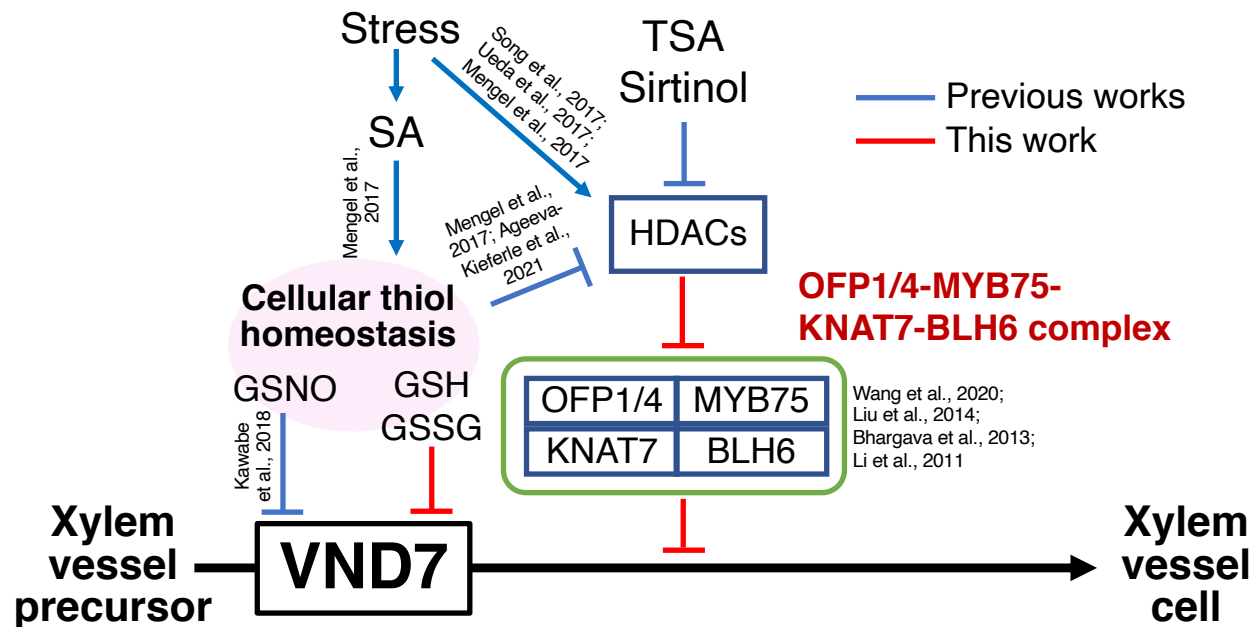

**Supplementary Figure S11. Proposed role of HDAC in xylem vessel cell differentiation.** Based on the results, we propose that histone deacetylation regulates the OFP1/4–MYB75–KNAT7–BLH6 transcriptional repression complex during xylem vessel cell differentiation. It is widely accepted that histone deacetylase (HDAC)-mediated regulation of histone deacetylation is a key step for relaying environmental signals to gene expression. Therefore, HDACs could control xylem vessel cell differentiation according to environmental conditions through the transcriptional repression complex.

## 1.2 Supplementary Table

**Supplementary Table 1. Cellular stress inducers used in this study.**

| Chemical                                                 | Activity                                                                           | Solvent    | Standard concentration | Supplier                 |
|----------------------------------------------------------|------------------------------------------------------------------------------------|------------|------------------------|--------------------------|
| cPTIO                                                    | NO scavenger                                                                       | Water      | 500 mM                 | CAYMAN                   |
| Dithiothreitol                                           | Reducing agent, inducer of Endoplasmic reticulum stress                            | Water      | 2 mM                   | nacalai tesque           |
| Potassium nitrate                                        | Inhibitor of plasma membrane ATPase                                                | Water      | 250 mM                 | nacalai tesque           |
| Chlorpromazine, Hydrochloride                            | Inhibitor of NO synthetase, Antagonist of Calmodulin                               | Water      | 50 mM                  | nacalai tesque           |
| oxidized glutathione (GSSG, Glutathione-S-S-Glutathione) | Disturbs thiol homeostasis                                                         | Water      | 3 mM                   | WAKO                     |
| reduced glutathione (GSH, Glutathione-SH)                | Disturbs thiol homeostasis                                                         | Water      | 3 mM                   | nacalai tesque           |
| Caffeic Acid                                             | Glutathione S-transferase inhibitor                                                | EtOH       | 100 mM                 | Tokyo Chemical Industry  |
| Sodium citrate                                           | Reducing agent, Inhibitor of DNase                                                 | Water      | 50 mM                  | nacalai tesque           |
| NG-Nitro-L-arginine Methyl Ester, Hydrochloride          | Inhibitor of NO synthetase                                                         | Water      | 10 mM                  | nacalai tesque           |
| Okadaic acid                                             | Inhibitor of protein kinase                                                        | DMSO       | 1 nM                   | WAKO                     |
| U0126                                                    | Inhibitor of MAPK                                                                  | DMSO       | 10 uM                  | CAYMAN                   |
| Staurosporine                                            | Inhibitor of kinase                                                                | DMSO       | 1 uM                   | WAKO                     |
| Ku55933 (IATM)                                           | competitive ATM kinase inhibitor                                                   | DMSO       | 10 uM                  | Abcam                    |
| Indomethacin                                             | Inhibitor of phospholipase and cyclooxygenase                                      | EtOH       | 10 uM                  | nacalai tesque           |
| PD98059                                                  | MEK inhibitor                                                                      | DMSO       | 10 uM                  | CAYMAN                   |
| N-ethylmaleimide                                         | cysteine protease inhibitor                                                        | EtOH       | 200 mM                 | Tokyo Chemical Industry  |
| Verapamil                                                | Calcium channel blocker                                                            | DMSO       | 10 uM                  | Tokyo Chemical Industry  |
| Diethyl-stilbestrol                                      | Inhibitor of H <sup>+</sup> /K <sup>+</sup> -exchanging ATPase and calcium channel | EtOH       | 100 uM                 | Tokyo Chemical Industry  |
| Sodium vanadate                                          | Inhibitor of alkaline phosphatase and (Na,K)-ATPase                                | Water      | 100 uM                 | KANTO KAGAKU             |
| Tunicamycin                                              | Protein glycosylation inhibitor                                                    | DMSO       | 5 µg/mL                | WAKO                     |
| N,N'-dicyclohexyl-carbodiimide                           | H <sup>+</sup> -ATPase inhibitor                                                   | EtOH       | 5 µM                   | Tokyo Chemical Industry  |
| Hydroxyurea                                              | Ribonucleotide reductase inhibitor                                                 | Water      | 1 mM                   | WAKO                     |
| Zeocin                                                   | Inhibitor of DNA base excision repair pathway                                      | Water      | 10µM                   | Invivogen                |
| Aurintricarboxylic acid                                  | Inhibitor of DNase                                                                 | EtOH       | 50 uM                  | Sigma                    |
| W-7 Hydrochloride                                        | calmodulin antagonist                                                              | DMSO       | 50 uM                  | CAYMAN                   |
| sodium butyrate                                          | HDAC inhibitor                                                                     | Water      | 100 mM                 | Tokyo Chemical Industry  |
| 5-aza-2'-deoxycytidine                                   | Inhibitor of DNA methylation                                                       | EtOH       | 20 mg/L                | WAKO                     |
| Trichostatin A                                           | HDAC inhibitor                                                                     | DMSO       | 0.5 µM                 | CAYMAN                   |
| Anacardic acid                                           | Inhibitor of histone acetyltransferases                                            | DMSO       | 20 uM                  | CAYMAN                   |
| Curcumin                                                 | HDAC inhibitor                                                                     | DMSO       | 40 uM                  | Tokyo Chemical Industry  |
| Sirtinol                                                 | HDAC inhibitor                                                                     | DMSO       | 10 uM                  | Santa Cruz Biotechnology |
| Epigallocatechin gallate                                 | Inhibitor of telomerase and DNA methyltransferase                                  | Water      | 500 uM                 | Tokyo Chemical Industry  |
| MG132                                                    | Proteasome inhibitor                                                               | DMSO       | 50 uM                  | Peptide Institute, Inc.  |
| E64                                                      | Cys peptidase inhibitor                                                            | Water      | 5 uM                   | Sigma                    |
| Wortmannin                                               | PI3 kinase inhibitor                                                               | DMSO       | 10 uM                  | AdipoGen                 |
| Phenylarsine oxide                                       | PI4 kinase inhibitor                                                               | DMSO       | 10 uM                  | Santa Cruz Biotechnology |
| Pladinoride B                                            | pre-mRNA splicing inhibitor                                                        | DMSO       | 1 uM                   | CAYMAN                   |
| 5-fluorouracil                                           | Inhibitor of RNA biosynthesis                                                      | DMSO       | 45 mM                  | WAKO                     |
| Silver Thiosulfate(Silver Nitrate + Sodium Thiosulfate)  | Inhibitor of ethylene signaling                                                    | Water      | 6 uM                   | Sigma                    |
| Streptomycin                                             | Inhibitor of protein synthesis of bacteria and organella                           | Water      | 200 mg/L               | nacalai tesque           |
| 3-(3,4-dichlorophenyl)-1,1-dimethylurea (DCMU)           | Inhibitor of photosynthesis system II                                              | EtOH       | 10 m M                 | WAKO                     |
| 8-Br-cAMP                                                | Activator of cyclic-AMP-dependent protein kinase                                   | Water      | 10 mM                  | CAYMAN                   |
| ODQ(1H-[1,2,4]Oxadiazolo[4,3-a]quinoxalin-1-one)         | Inhibitor of no-sensitive guanylyl cyclase                                         | DMSO       | 4µ M                   | CAYMAN                   |
| EDTA2Na                                                  | Chelating agent                                                                    | Water      | 10 mM                  | WAKO                     |
| o-phenanthroline                                         | Inhibitor of matrix metalloproteinase (MMP)                                        | Water      | 2 mM                   | nacalai tesque           |
| Cdk4/6 Inhibitor IV                                      | Cdk4/6 inhibitor                                                                   | DMSO       | 1 mM                   | CAYMAN                   |
| Trimethoprim                                             | Inhibitor of tetrahydrofolic acid synthesis                                        | DMSO       | 50 mM                  | nacalai tesque           |
| Glyphosate                                               | Inhibitor of Shikimate pathway                                                     | Water      | 0.5 mM                 | Sigma                    |
| 1-Triacontanol                                           | Plant growth regulator                                                             | Chloroform | 0.5 uM                 | CAYMAN                   |
| Glutamate                                                | Signal mediator                                                                    | Water      | 1 mM                   | nacalai tesque           |

**Supplementary Table 2. Primers used in this study.**

| Primers for qRT-PCR |                                |
|---------------------|--------------------------------|
| Primer Name         | Sequence (5'-3')               |
| OFPI-L              | ATGGGTAAATACTATCGGTTTA         |
| OFPI-R              | GCTATTTGGTTGGCTCTGAAGATTCT     |
| OFPI-L              | AGAGCAAACAAGATGTTCTA           |
| OFPI-R              | TTGTAAAGTTGAAGCCAGAT           |
| OFPI-L              | ATGAAACAGAAAATGGGGAC           |
| OFPI-R              | TTGGGAGAAGAAAGATGGTG           |
| OFPI-L              | ATGAGGAACTATAAGTTAAGA          |
| OFPI-R              | TATGGAGTAAAGAGGAAGAGA          |
| OFPI-L              | GATGGAGGAATGGAGAACGA           |
| OFPI-R              | TTATGCACCTGCTGGAACAC           |
| MC9-qRT F           | GTCCATGAAGAACAAGCAA            |
| MC9-qRT R           | AGAAAGGAACGTCGCGTCT            |
| CCoAOMT7-qRT F      | ggaaactaagacttcagtcactgag      |
| CCoAOMT7-qRT R      | gagctctcacttttcagcaatc         |
| MYB63-qRT F         | aacagctcaggctcaagagcaac        |
| MYB63-qRT R         | atgtatcatgagctcgtagttctt       |
| BLH6-qRT F          | caagacaaacgggcttgag            |
| BLH6-qRT R          | ttctctctgtatctctctcca          |
| SRT1 qRT F          | AGACCTGAAATGGAAGCTGG           |
| SRT1 qRT R          | CTATGCCTTGGTTTCTTCTGCC         |
| SRT2 qRT F          | TCATGAGGCTGGTGCTATGAC          |
| SRT2 qRT R          | CTAGAGAGCTGGGACACTGAG          |
| MYB75 qRT R         | AAGCCTATGAAGGCGAAGAA           |
| MYB75 qRT L         | TGGCACCAAGTTCCTGTAAG           |
| OFPI qRT R          | gaatcttcagagccaacaaa           |
| OFPI qRT L          | gtaggagactgcgtggtgttt          |
| KNAT7 qRT F         | CGAGAAATCGAAGATGTAAGAG         |
| KNAT7 qRT R         | GTGTTTGCCTTGGACTTCAA           |
| XND1-qRT F          | attacgatcttggaccttc            |
| XND1-qRT R          | tgtctgtcactctctctgtgtc         |
| OFPI qRT F          | catttcacaaagccatgattct         |
| OFPI qRT R          | cagaagaaatgactttcaagttgg       |
| MYB4 qRT F          | actatctccgctgacctt             |
| MYB4 qRT R          | cggcaataagcgaccatt             |
| MYB7 qRT F          | tgttggcgatctctctctaga          |
| MYB7 qRT R          | aagacggcagctttaccg             |
| MYB32 qRT F         | ctgtcaagattctctctttgtgc        |
| MYB32 qRT R         | aattctctgtcccgaaat             |
| MYB5 qRT F          | aattacgtcggacgaggaag           |
| MYB5 qRT R          | cttcccgcgatcaatgac             |
| XCP1-for1           | TTGACCCATGAAGAGTTCAAAGGAAGA    |
| XCP1-rev1           | GAAAGCGAACTCAGATTCCTGTTG       |
| MYB046-for2         | GAATGTGAAGAAGGTGATTGGTACA      |
| MYB046-rev4         | CGAAGGAACCTCAGTGTTTCATCA       |
| LBD30-for4          | CTATCTACGGCTGCGTCTCTCACATCGT   |
| LBD30-rev7          | TAGAGATCCTGAAGATGACACCGGAAC    |
| Ubq10-for1          | AACTTTGGTGGTTTGTGTTTTGG        |
| Ubq10-rev1          | TCGACTTGTCATTAGAAAAGAAAGAGATAA |
| CesA7-RT-for1       | ATGGGTAGACAGAACAGAACACCAA      |
| CesA7-RT-rev1       | CTTCAGCAGTTGATGCCACACTT        |
| IRX8-RT-for1        | TCAAGAGCTGTCACATTAGAGCAT       |
| IRX8-RT-rev1        | ATGATCCGGTAGAGAAGTGAAAAC       |
| endo_VND7_RT_F      | aatacgtttatagatcatcgtgg        |
| endo_VND7_RT_R      | TTTGATAGTACCGCCTTGCTCTAC       |
| exo_VND7_RT_F       | cttggatgcttcctgactc            |
| exo_VND7_RT_R       | gtcctcgccgtctaagtgg            |

| <b>Primers for genotyping of <i>opf</i> mutants</b> |                    |                               |
|-----------------------------------------------------|--------------------|-------------------------------|
| <b>Mutant</b>                                       | <b>Primer Name</b> | <b>Sequence (5'-3')</b>       |
| <i>opf1</i>                                         | SM_3_21689-L       | ATGGGTAATAACTATCGGTTTAAG      |
|                                                     | SM_3_21689-R       | TTATTTGGAATGGGGTGGTGGAA       |
|                                                     | Tran-element       | TACGAATAAGAGCGTCCATTTTAGAGTGA |
| <i>opf2</i>                                         | SALK_122550-L      | ACCAAATTCAAAGAAGCATCG         |
|                                                     | SALK_122550-R      | TGGTGAGTTATGGTGAGGAGG         |
|                                                     | LBb1.3             | ATTTTGCCGATTTCGGAAC           |
| <i>opf3</i>                                         | GABI_167F01-L      | CAGAAAATGGGGACTCACAAG         |
|                                                     | GABI_167F01-R      | TGACTTTGAGAAAGAGGACGG         |
|                                                     | GK T-DNA           | ATATTGACCATCATACTCATTGC       |
| <i>opf4</i>                                         | SALK_022396-L      | ATGAGGAACATAAGTTAAGATTG       |
|                                                     | SALK_022396-R      | CTACTTCGATGCAAATGTAGAG        |
|                                                     | LBb1.3             | ATTTTGCCGATTTCGGAAC           |
| <i>opf5</i>                                         | SALK_203823-L      | GACAACATCTTCATCTCCCTCC        |
|                                                     | SALK_203823-R      | ATTATGCACCTGCTGGAACAC         |
|                                                     | LBb1.3             | ATTTTGCCGATTTCGGAAC           |
